# Supplementary material for: MT1-MMP activatable fluorogenic probes with enhanced specificity via high-affinity peptide conjugation for tumor imaging
Source: Royal Society of Chemistry journal article supplement (doi:10.1039/c9bm02007a), 2020-01-01
Supplement: c9bm02007a1.pdf [file c9bm02007a1.pdf]

## Supporting Information

### **MT1-MMP activatable fluorogenic probes with enhanced specificity via high-affinity peptide conjugation for tumor imaging**

Xiuru Ji,<sup>a</sup> Shuping Xie,<sup>a</sup> Yan Jiao,<sup>a</sup> Xiaojuan Zhang,<sup>a</sup> Duxin Sun,<sup>b</sup> Victor C. Yang,<sup>a,b</sup> Mei Wang,<sup>c</sup> Huining He<sup>\*a</sup> and Lu Sun<sup>\*a</sup>

a. Tianjin Key Laboratory on Technologies Enabling Development of Clinical Therapeutics and Diagnostics (Theranostics), School of Pharmacy, Tianjin Medical University, Tianjin 300070, China.

b. Department of Pharmaceutical Sciences, College of Pharmacy, University of Michigan, Ann Arbor, Michigan 48109-1065, United States.

c. Department of Pharmaceutics, School of Pharmacy, Xinjiang Medical University, Urumqi 830054, China.

Correspondence: Huining He (hehuining@tmu.edu.cn)

Lu Sun (sunlu@tmu.edu.cn)

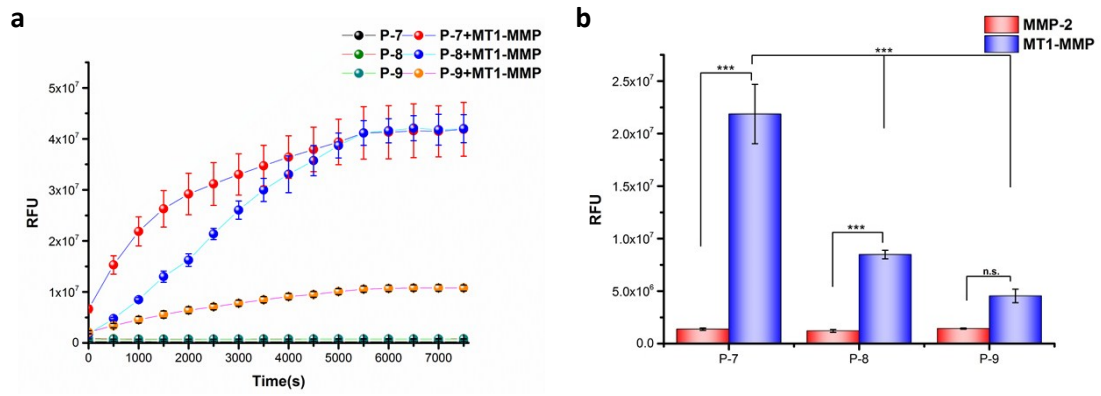

**Fig. S1** Activation efficiency evaluation of three fluorogenic probes (P-7, P-8 and P-9) by the MT1-MMP. (a) Fluorescence emission kinetic spectra of three probes (P-7, P-8 and P-9, 1  $\mu$ M) in the presence of MT1-MMP (45 nM). (b) Fluorescence activation of fluorogenic probes (1  $\mu$ M) by the same concentration (45 nM) of MMP-14 and MMP-2 following a 7 min incubation at 37  $^{\circ}$ C. And the data are shown as the mean  $\pm$  SD. n.s., not significant; asterisks (\*) represent statistically significant (\*\* $p$  < 0.01, and \*\*\* $p$  < 0.001).

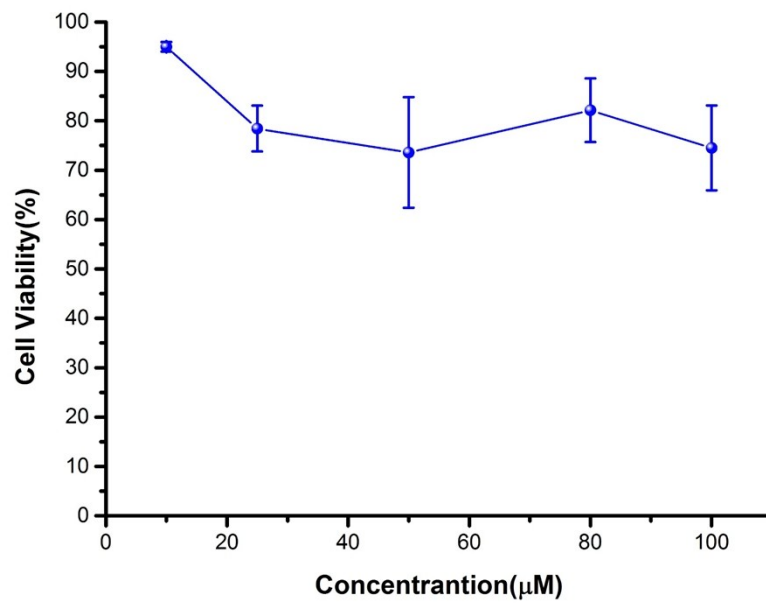

**Fig. S2** Preliminary toxicity assessment of P-7. Cell viability study of P-7 with HUVEC cells.

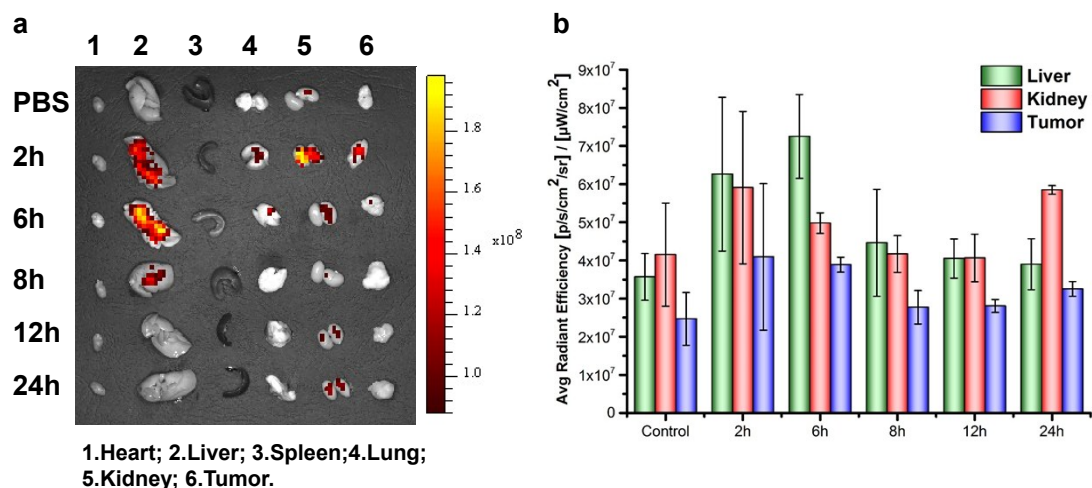

**Fig. S3** The fluorescence distribution of the probe P-7 after intravenous injection. (a) Images of the main organs of tumor-bearing mice sacrificed at different time point post-injection (0, 2, 6, 8, 12, and 24 h) after intravenous injection of the fluorescent probes. (Lanes 1, Heart; Lanes 2, Liver; Lanes 3, Spleen; Lanes 4, Lung; Lanes 5, Kidney; Lanes 6, Tumor.). (b) Radiant efficiency in the tumor, liver and kidney.

**Table S1** Kinetic parameters of the fluorogenic probes (P-5 and P-7) catalyzed by MMP-14

| Probes | Sequences                                                     | $K_m$ ( $\mu\text{M}$ ) | $k_{\text{cat}}$ ( $\text{s}^{-1}$ )          | $k_{\text{cat}}/K_m$ ( $\text{M}^{-1} \text{s}^{-1}$ ) |
|--------|---------------------------------------------------------------|-------------------------|-----------------------------------------------|--------------------------------------------------------|
| P-5    | (MCA)-PLGL-(Dpa)-AR-(PEG) <sub>12</sub> -<br>HWKHLHNTKTFL     | 0.40±0.03               | $2.44 \times 10^{-3} \pm 0.04 \times 10^{-3}$ | $6.15 \times 10^{-3} \pm 0.44 \times 10^{-3}$          |
| P-7    | (FAM)-PLGLK-(DabcyI)-AR-(PEG) <sub>12</sub> -<br>HWKHLHNTKTFL | 11.41±1.07              | $4.07 \times 10^{-2} \pm 0.21 \times 10^{-2}$ | $3.56 \times 10^{-3} \pm 0.33 \times 10^{-3}$          |
